# Supplementary material
Source: HighWire-hosted journal article supplement (http://ajnr-stage2.highwire.org/highwire/filestream/101971/field_highwire_adjunct_files/0/0931.pdf)
Supplement: 0931.pdf [file 0931.pdf]

**Table 1 Patient and aneurysm characteristics (233 aneurysms in 212 patients)**

|                                                             |  |                 |
|-------------------------------------------------------------|--|-----------------|
| <b><u>Patients</u></b>                                      |  |                 |
| <b>Age (years)</b>                                          |  |                 |
| Mean ( $\pm$ SD)                                            |  | 55.2 $\pm$ 11.4 |
| <b>Gender, n (%)</b>                                        |  |                 |
| Men                                                         |  | 79 (37.3)       |
| Women                                                       |  | 133 (62.7)      |
| <b>mRS preoperative, n (%)</b>                              |  |                 |
| mRS $\leq$ 2                                                |  | 208 (98.1)      |
| mRS>2                                                       |  | 4 (1.9)         |
| <b><u>Aneurysms</u></b>                                     |  |                 |
| <b>Status, n (%)</b>                                        |  |                 |
| Unruptured                                                  |  | 178 (76.4)      |
| Ruptured                                                    |  | 52 (22.3)       |
| Recurrent                                                   |  | 3 (1.3)         |
| <b>Location, n (%)</b>                                      |  |                 |
| Typical                                                     |  |                 |
| ACom                                                        |  | 195 (83.7)      |
| MCA bifurcation                                             |  | 68 (29.2)       |
| ICA terminus                                                |  | 101 (43.3)      |
| Basilar tip                                                 |  | 17 (7.3)        |
| Atypical                                                    |  |                 |
| ICA ophthalmic                                              |  | 9 (3.9)         |
| ICA Pcom                                                    |  | 38 (16.3)       |
| ICA ACho                                                    |  | 4 (1.7)         |
| Behind A1                                                   |  | 15 (6.5)        |
| AICA                                                        |  | 4 (1.7)         |
| PICA                                                        |  | 7 (3.0)         |
| SCA                                                         |  | 1 (0.4)         |
|                                                             |  | 4 (1.7)         |
|                                                             |  | 3 (1.3)         |
| <b>Aneurysm size (mm)*</b>                                  |  |                 |
| Mean width (Mean $\pm$ SD)                                  |  | 4.5 $\pm$ 1.3   |
| Maximum width (Mean $\pm$ SD)                               |  | 4.8 $\pm$ 1.4   |
| Maximum height (Median (IQR))                               |  | 4.5 (3.7-5.5)   |
| <b>Angle Aneurysm / Artery <math>\geq</math> 45°, n (%)</b> |  | 61 (26.2)       |
| <b>Wide-neck aneurysm, n (%)</b>                            |  | 226 (97.0)      |

Note: Continuous variables are described as mean and median (interquartile range) and categorical variables as a number (percentage). mRS= modified Rankin Score. mRS 0: No symptoms. mRS 1: No significant disability despite symptoms: able to carry out all usual duties and activities. mRS 4: Moderately severe disability: unable to walk without assistance and unable to attend to own bodily needs without assistance. mRS 6: Dead. \* Mean size was calculated among 2 measures taken in 2 orthogonal plans. ICA, internal carotid artery; MCA, middle cerebral artery; ACom, anterior communicating artery; ACho, anterior choroidal artery; PCom, posterior communicating artery; AICA, antero-inferior cerebellar artery; PICA, posterior-inferior cerebellar artery; and SCA, superior cerebellar artery.

**Table 3 Feasibility, Efficacy, and Safety**

|                                               | <b>Total</b>         | <b>Unruptured<br/>and recurrent</b> | <b>Ruptured</b>     | <b>p value</b> |
|-----------------------------------------------|----------------------|-------------------------------------|---------------------|----------------|
| <b>Baseline population, n (%)</b>             |                      |                                     |                     |                |
| Aneurysms                                     | 233                  | 181 (77.7)                          | 52 (22.3)           |                |
| Patients                                      | 212                  | 162 (76.4)                          | 50 (23.6)           |                |
| <b>WEB successful implantation, n (%)</b>     | <b>222 (95.3)</b>    | <b>173 (95.6)</b>                   | <b>49 (94.2)</b>    | <b>0.71</b>    |
| <b>Complications, (n (%))</b>                 | <b>36/212 (16.9)</b> | <b>26/162 (16.0)</b>                | <b>10/50 (20.0)</b> | <b>0.52</b>    |
| Intraprocedural thromboembolic complication   | 15 (7.1)             | 6 (3.7)                             | 9 (18.0)            | 0.001          |
| Intraprocedural haemorrhagic complication     | 3 (1.4)              | 3 (1.8)                             | 0 (0.0)             | 1              |
| Point of puncture complication                | 2 (0.9)              | 2 (1.2)                             | 0 (0.0)             | 1              |
| Postprocedural complication                   | 16 (7.5)             | 15 (9.3)                            | 1 (2.0)             | 0.13           |
| <b>Safety at 1 month, n (%)</b>               |                      |                                     |                     | <b>0.001</b>   |
| mRS 0                                         | 153 (72.2)           | 129 (79.6)                          | 24 (48.0)           |                |
| mRS 1                                         | 29 (13.7)            | 19 (11.7)                           | 10 (20.0)           |                |
| mRS 2                                         | 13 (6.1)             | 7 (4.3)                             | 6 (12.0)            |                |
| mRS 3                                         | 3 (1.4)              | 2 (1.2)                             | 1 (2.0)             |                |
| mRS 4                                         | 7 (3.3)              | 4 (2.5)                             | 3 (6.0)             |                |
| mRS 5                                         | 3 (1.4)              | 1 (0.7)                             | 2 (4.0)             |                |
| mRS 6                                         | 4 (1.9)              | 0 (0.0)                             | 4 (8.0)             |                |
| Overall morbidity                             | 8 (3.8)              | 3 (1.9)                             | 5 (10.0)            | 0.02           |
| Procedural-related morbidity                  | 5 (2.4)              | 3 (1.9)                             | 2 (4.0)             | 0.34           |
| SAH-related morbidity                         | 3 (1.4)              | 0 (0.0)                             | 3 (6.0)             |                |
| Overall mortality                             | 4 (1.9)              | 0 (0.0)                             | 4 (8.0)             | 0.003          |
| SAH-related mortality                         | 4 (1.9)              | 0 (0.0)                             | 4 (8.0)             |                |
| <b>Safety at 12 months, n (%)</b>             | <b>n=205*</b>        | <b>n=156</b>                        | <b>n=49</b>         | <b>0.37</b>    |
| mRS 0                                         | 154 (75.1)           | 127 (81.5)                          | 27 (55.1)           |                |
| mRS 1                                         | 23 (11.2)            | 14 (9.0)                            | 9 (18.4)            |                |
| mRS 2                                         | 11 (5.4)             | 8 (5.1)                             | 3 (6.2)             |                |
| mRS 3                                         | 3 (1.5)              | 2 (1.2)                             | 1 (2.0)             |                |
| mRS 4                                         | 5 (2.4)              | 4 (2.6)                             | 1 (2.0)             |                |
| mRS 6                                         | 9 (4.4)              | 2 (1.2)                             | 7 (14.3)            |                |
| Overall morbidity                             | 4 (1.9)              | 2 (1.2)                             | 2 (4.0)             | 0.24           |
| Procedural-related morbidity                  | 3 (1.4)              | 2 (1.2)                             | 1 (2.0)             | 0.56           |
| SAH-related morbidity                         | 1 (0.5)              | 0 (0.0)                             | 1 (2.0)             | 0.24           |
| Overall mortality                             | 9 (4.4)              | 2 (1.2)                             | 7 (14.3)            | 0.001          |
| Procedural-related mortality                  | 2 (1.0)              | 2 (1.2)                             | 0 (0.0)             | 1              |
| SAH-related mortality                         | 6 (2.9)              | 0 (0.0)                             | 6 (12.3)            | 0.001          |
| Unrelated-disease                             | 1 (0.5)              | 0 (0.0)                             | 1 (2.0)             | 0.24           |
| <b>Aneurysm occlusion at 12 months, n (%)</b> | <b>n=197*</b>        | <b>n=157</b>                        | <b>n=40</b>         | <b>0.18</b>    |
| Complete occlusion                            | 133 (67.5)           | 108 (68.8)                          | 25 (62.5)           |                |
| Neck remnant                                  | 37 (18.8)            | 31 (19.7)                           | 6 (15.0)            |                |
| Aneurysm remnant                              | 27 (13.7)            | 18 (11.5)                           | 9 (22.5)            |                |

|                    |            |            |           |      |
|--------------------|------------|------------|-----------|------|
| Adequate occlusion | 170 (86.3) | 139 (88.5) | 31 (77.5) | 0.05 |
| Aneurysm retreated | 4 (2.0)    | 2 (1.3)    | 2 (5.0)   | 0.18 |

---

Categorical variables are described as number (percentage). mRS, modified Rankin Score. SAH subarachnoid hemorrhage. \*See the text and figure 1 for the explications.
